# Supplementary material for: Design, fabrication and characterization of a magnetite-chitosan coated iron-based metal–organic framework (Fe3O4@chitosan/MIL-100(Fe)) for efficient curcumin delivery as a magnetic nanocarrier
Source: Royal Society of Chemistry journal article supplement (doi:10.1039/d5ra00162e), 2025-01-01
Supplement: d5ra00162e1.pdf [file d5ra00162e1.pdf]

## SUPPORTING INFORMATION

### **Design, Fabrication and Characterization of Magnetite-Chitosan Coated Iron-Based Metal-Organic Framework (Fe<sub>3</sub>O<sub>4</sub>@chitosan/MIL-100(Fe)) for Efficient Curcumin Delivery as a Magnetic Nanocarrier**

**Fatemeh Parsa<sup>1</sup>, Moslem Setoodehkhah<sup>1\*</sup>, Seyed Mohammad Atyabi<sup>2</sup>**

Corresponding author's email: setoodehkhah@kashanu.ac.ir

<sup>1</sup>Department of Inorganic Chemistry, Faculty of Chemistry, University of Kashan, Kashan, Iran

<sup>2</sup>Ph.D Department of Pilot Biotechnology Pasteur Institute of Iran Tehran, Iran

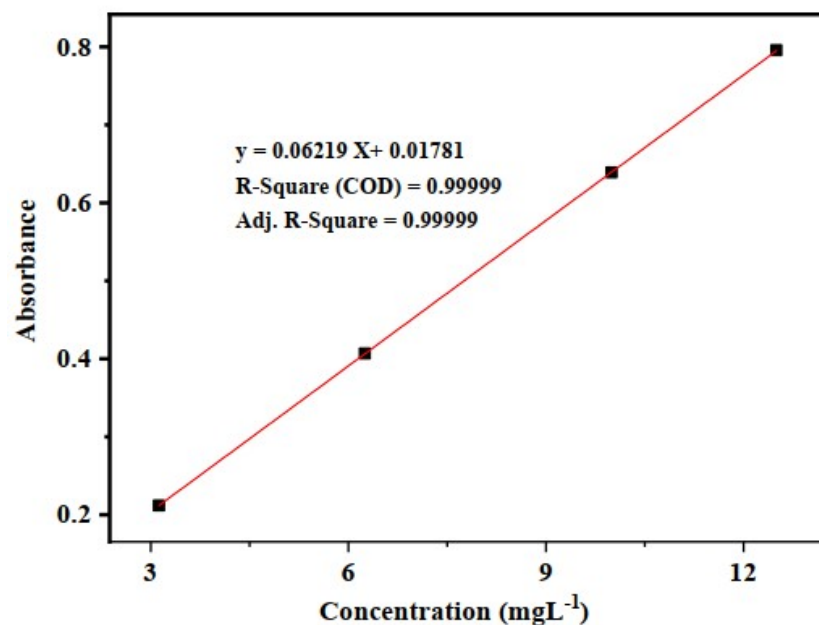

**Fig. S1** calibration curve of curcumin in water –acetone

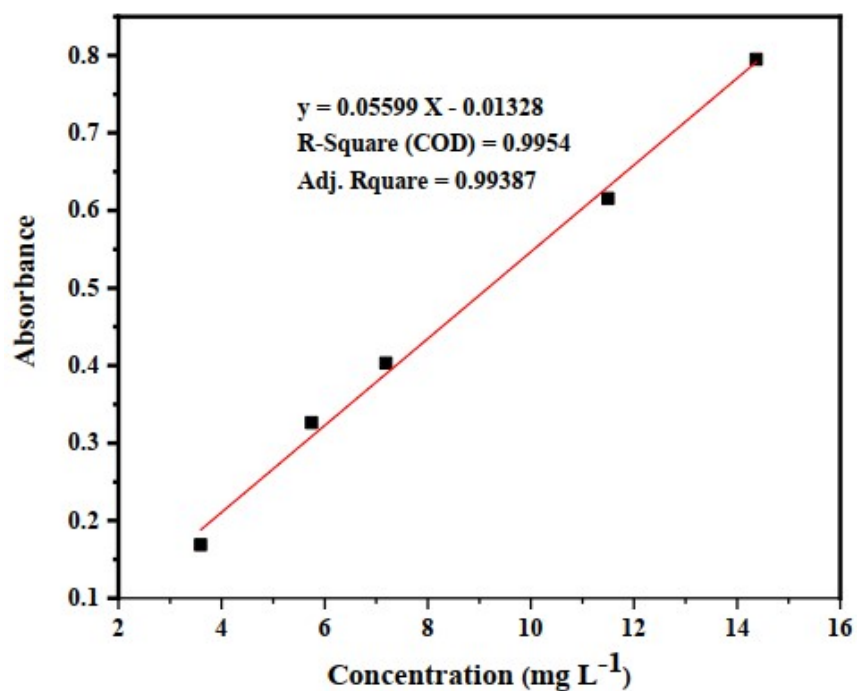

**Fig. S2** calibration curve of curcumin in Acetone minimum and 0.1% tween 80-  
buffer pH: 7.4

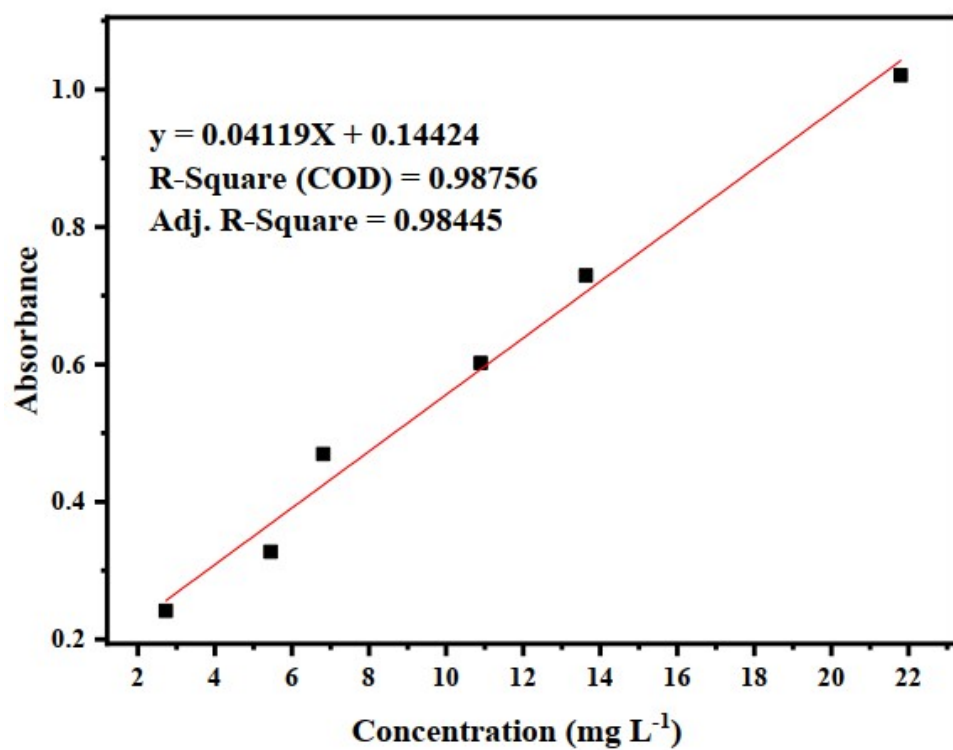

**Fig. S3** calibration curve of curcumin in acetone minimum and 0.1% tween 80-buffer pH: 5.0

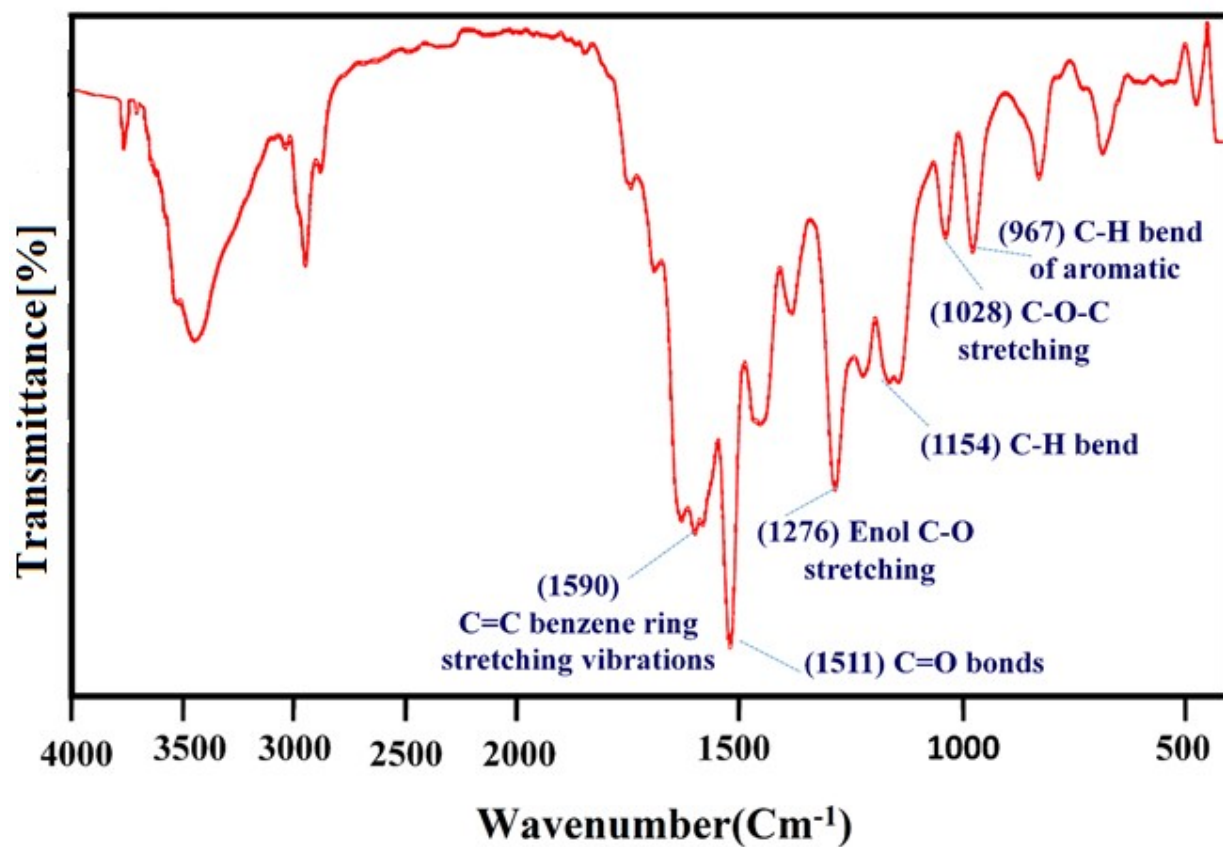

**Fig. S4** the FT-IR spectrum of extracted curcumin

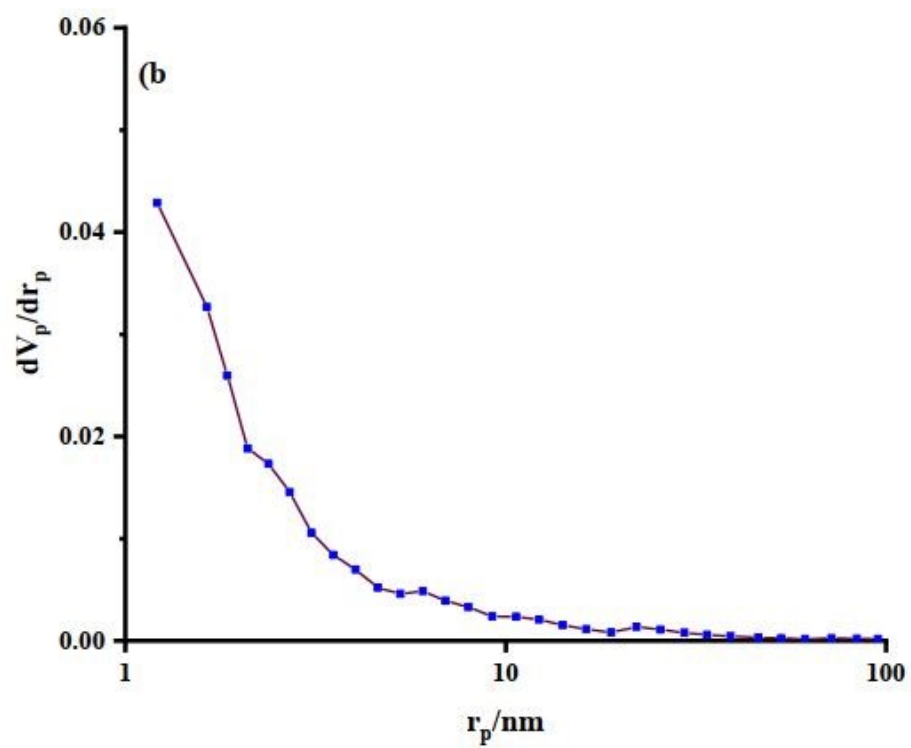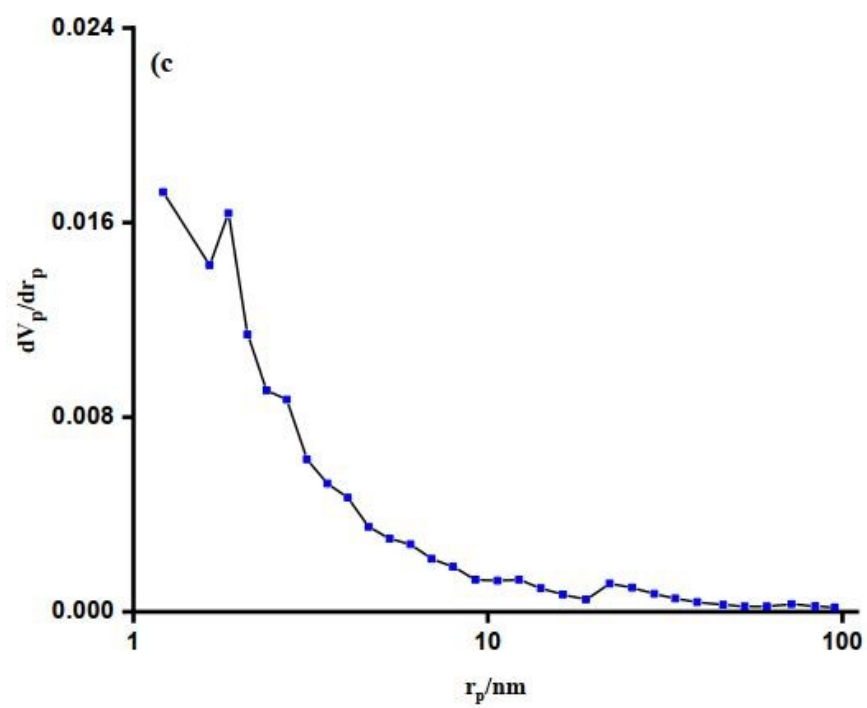

Fig S5 BJH plots (b, c) of FCM and LFCM

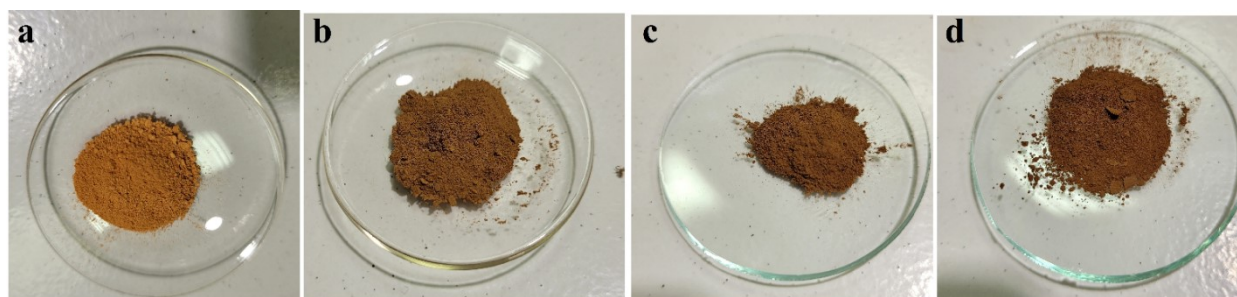

**Fig. S6** The powder forms of a) MIL-100(Fe), b) FC/MIL100(Fe)=0.5, c) FC/MIL100(Fe)=1.0 and d) FC/MIL100(Fe)=2.0
